# Supplementary material for: Clinical and Paraclinical Indicators of Motor System Impairment in Hereditary Spastic Paraplegia: A Pilot Study
Source: PubMed Central journal article supplement (PMC4831837; doi:10.1371/journal.pone.0153283), 2016-04-14
Supplement: pone.0153283.s001.pdf [file pone.0153283.s001.pdf]

Martinuzzi et al.,

1 **Supporting information S1**

2

3 Table of contents

4

5 1. Supplementary findings: Genetic Profile of the patients

6 2. ROIs delineation for DTI sampling

7 3. H-MR spectroscopy results

8 4. S1 Supplementary References

9

10 **1. Supplementary findings: Genetic Profile of the patients**

11

12 From the genetic testing, 19 patients were found to have new mutation. Three 3 new deletions in  
13 SPG4: c.1620\_1623delGACT/InsC (3 related patients), exon 16 deletion (MLPA) (1 patient), exon  
14 17 deletion (MLPA) (4 patients) and one deletion in SPG11 c.408\_428del21 p.E136\_I142del (1  
15 patients). Other 10 mutations were found in 10 SPG4 patients (S1 Table).

16 **2. ROIs delineation for DTI sampling**

17

18 All delineations of the Regions of Interest (ROIs) were performed by three operators (26, 16 and 3  
19 years of experience, respectively for DM, HH and MV). The ROIs were applied to the DTI maps in  
20 2 different stages: an instruction stage, during which in two weeks of daily work, the accuracy of  
21 MRI anatomical location of the ROIs were discussed among the three operators and then  
22 reconstructed for all the 22 normal subjects and repeated for the patient group. When the  
23 accordance of anatomical positioning and the corresponding FA and MD values were close to both  
24 the operator, in the last stage two operators (HH and MV) independently created individual data set,  
25 extracting single FA and MD values for each volunteer and patient; inter-observer agreement was  
26 also calculated (HH vs MV). ROIs positioned by the second operator (MV) were repeated twice in  
27 order to study intra-observer agreement.

28 **3. H-MR spectroscopy results**

29 By H-MRS samplings no significant differences between HPS patients and controls were identified.  
30 The recent reports on MRS technique concerning some minimal variations in HSP patients [S25-  
31 S27] are not confirmed in this study: we found no differences in <sup>1</sup>H-MRS metabolic profile  
32 between HSP patients and controls and no correlation with clinical/paraclinical variables. Possible  
33 explanations could be the limited strength of the magnet (1.5T), the limited dimension of the  
34 sampling volume and the nature of the possible metabolic variation itself, which may be too subtle  
35 to be detected in a limited number of patients.

36 **4. S1 Supplementary References**

37 **S1 Supplementary References**

- 38 S1. Patrono C, Scarano V, Cricchi F, Melone MA, Chiriaco M, Napolitano A, Malandrini A, De  
39 Michele G, Petrozzi L, Giraldi C, Santoro L, Servidei S, Casali C, Filla A, Santorelli FM.  
40 Autosomal dominant hereditary spastic paraplegia: DHPLC-based mutation analysis of  
41 SPG4 reveals eleven novel mutations. *Hum Mutat.* 2005 May;25(5):506. PMID: 15841487.
- 42 S2. Fonknechten N, Mavel D, Byrne P, Davoine CS, Cruaud C, Bönsch D, Samson D, Coutinho  
43 P, Hutchinson M, McMonagle P, Burgunder JM, Tartaglione A, Heinzlef O, Feki I, Deufel  
44 T, Parfrey N, Brice A, Fontaine B, Prud'homme JF, Weissenbach J, Dürr A, Hazan J. Spectrum  
45 of SPG4 mutations in autosomal dominant spastic paraplegia. *Hum Mol Genet.* 2000 Mar  
46 1;9(4):637-44.
- 47 S3. Crippa F, Panzeri C, Martinuzzi A, Arnoldi A, Redaelli F, Tonelli A, Baschirotto C, Vazza  
48 G, Mostacciuolo ML, Daga A, Orso G, Profice P, Trabacca A, D'Angelo MG, Comi GP,  
49 Galbiati S, Lamperti C, Bonato S, Pandolfo M, Meola G, Musumeci O, Toscano A, Trevisan  
50 CP, Bresolin N, Bassi MT. Eight novel mutations in SPG4 in a large sample of patients with  
51 hereditary spastic paraplegia. *Arch Neurol.* 2006 May;63(5):750-5.
- 52 S4. Depienne C, Tallaksen C, Lephay JY, Bricka B, Poëa-Guyon S, Fontaine B, Labauge P,  
53 Brice A, Dürr A. Spastin mutations are frequent in sporadic spastic paraparesis and their  
54 spectrum is different from that observed in familial cases. *J Med Genet.* 2006  
55 Mar;43(3):259-65. Epub 2005 Jul 31.

Martinuzzi et al.,

- 56 S5. Meijer IA, Hand CK, Cossette P, Figlewicz DA, Rouleau GA. Spectrum of SPG4 mutations  
57 in a large collection of North American families with hereditary spastic paraplegia. Arch  
58 Neurol. 2002 Feb;59(2):281-6.
- 59 S6. Magariello A, Muglia M, Patitucci A, Mazzei R, Conforti FL, Gabriele AL, Sprovieri T,  
60 Ungaro C, Gambardella A, Mancuso M, Siciliano G, Branca D, Aguglia U, de Angelis MV,  
61 Longo K, Quattrone A. Novel spastin (SPG4) mutations in Italian patients with hereditary  
62 spastic paraplegia. Neuromuscul Disord. 2006 Jun;16(6):387-90. Epub 2006 May 8.
- 63 S7. Blair MA, Riddle ME, Wells JF, Breviu BA, Hedera P. Infantile onset of hereditary spastic  
64 paraplegia poorly predicts the genotype. Pediatr Neurol. 2007 Jun;36(6):382-6.
- 65 S8. Park SY, Ki CS, Kim HJ, Kim JW, Sung DH, Kim BJ, Lee WY. Mutation analysis of SPG4  
66 and SPG3A genes and its implication in molecular diagnosis of Korean patients with  
67 hereditary spastic paraplegia. Arch Neurol. 2005 Jul;62(7):1118-21.
- 68 S9. Hentati A, Deng HX, Zhai H, Chen W, Yang Y, Hung WY, Azim AC, Bohlega S, Tandan  
69 R, Warner C, Laing NG, Cambi F, Mitsumoto H, Roos RP, Boustany RM, Ben Hamida M,  
70 Hentati F, Siddique T. Novel mutations in spastin gene and absence of correlation with age  
71 at onset of symptoms. Neurology. 2000 Nov 14;55(9):1388-90.
- 72 S10. Dalpozzo F, Rossetto MG, Boaretto F, Sartori E, Mostacciuolo ML, Daga A, Bassi MT,  
73 Martinuzzi A. Infancy onset hereditary spastic paraplegia associated with a novel atlastin  
74 mutation. Neurology. 2003 Aug 26;61(4):580-1.

Martinuzzi et al.,

- 75 S11. Sauter SM, Engel W, Neumann LM, Kunze J, Neesen J. Novel mutations in the Atlastin  
76 gene (SPG3A) in families with autosomal dominant hereditary spastic paraplegia and  
77 evidence for late onset forms of HSP linked to the SPG3A locus. *Hum Mutat.* 2004  
78 Jan;23(1):98. PMID: 14695538.
- 79 S12. Goizet C, Boukhris A, Durr A, Beetz C, Truchetto J, Tesson C, Tsaousidou M, Forlani S,  
80 Guyant-Maréchal L, Fontaine B, Guimarães J, Isidor B, Chazouillères O, Wendum D, Grid  
81 D, Chevy F, Chinnery PF, Coutinho P, Azulay JP, Feki I, Mochel F, Wolf C, Mhiri C,  
82 Crosby A, Brice A, Stevanin G. CYP7B1 mutations in pure and complex forms of hereditary  
83 spastic paraplegia type 5. *Brain.* 2009 Jun;132(Pt 6):1589-600. doi:  
84 10.1093/brain/awp073. Epub 2009 May 12.
- 85 S13. Arnoldi A, Crimella C, Tenderini E, Martinuzzi A, D'Angelo MG, Musumeci O, Toscano A,  
86 Scarlato M, Fantin M, Bresolin N, Bassi MT. Clinical phenotype variability in patients with  
87 hereditary spastic paraplegia type 5 associated with CYP7B1 mutations. *Clin Genet.* 2012  
88 Feb;81(2):150-7. doi: 10.1111/j.1399-0004.2011.01624.x. Epub 2011 Jan 31.
- 89 S14. McDermott CJ, Dayaratne RK, Tomkins J, Lusher ME, Lindsey JC, Johnson MA, Casari G,  
90 Turnbull DM, Bushby K, Shaw PJ. Paraplegin gene analysis in hereditary spastic  
91 paraparesis (HSP) pedigrees in northeast England. *Neurology.* 2001 Feb 27;56(4):467-71.
- 92 S15. Arnoldi A, Tonelli A, Crippa F, Villani G, Pacelli C, Sironi M, Pozzoli U, D'Angelo MG,  
93 Meola G, Martinuzzi A, Crimella C, Redaelli F, Panzeri C, Renieri A, Comi GP, Turconi  
94 AC, Bresolin N, Bassi MT. A clinical, genetic, and biochemical characterization of SPG7

Martinuzzi et al.,

- 95 mutations in a large cohort of patients with hereditary spastic paraplegia. *Hum Mutat.* 2008  
96 Apr;29(4):522-31. doi: 10.1002/humu.20682.
- 97 S16. Crimella C1, Baschiroto C, Arnoldi A, Tonelli A, Tenderini E, Airoidi G, Martinuzzi A,  
98 Trabacca A, Losito L, Scarlato M, Benedetti S, Scarpini E, Spinicci G, Bresolin N, Bassi  
99 MT. Mutations in the motor and stalk domains of KIF5A in spastic paraplegia type 10 and  
100 in axonal Charcot-Marie-Tooth type 2. *Clin Genet.* 2012 Aug;82(2):157-64. doi:  
101 10.1111/j.1399-0004.2011.01717.x. Epub 2011 Jun 21.
- 102 S17. Musumeci O, Bassi MT, Mazzeo A, Grandis M, Crimella C, Martinuzzi A, Toscano A. A  
103 novel mutation in KIF5A gene causing hereditary spastic paraplegia with axonal  
104 neuropathy. *Neurol Sci.* 2011 Aug;32(4):665-8. doi: 10.1007/s10072-010-0445-8. Epub 2010 Nov  
105 24.
- 106 S18. Stevanin G, Santorelli FM, Azzedine H, Coutinho P, Chomilier J, Denora PS, Martin E,  
107 Ouvrard-Hernandez AM, Tessa A, Bouslam N, Lossos A, Charles P, Loureiro JL, Elleuch  
108 N, Confavreux C, Cruz VT, Ruberg M, Leguern E, Grid D, Tazir M, Fontaine B, Filla A,  
109 Bertini E, Durr A, Brice A. Mutations in SPG11, encoding spatacsin, are a major cause of  
110 spastic paraplegia with thin corpus callosum. *Nat Genet.* 2007 Mar;39(3):366-72. Epub  
111 2007 Feb 18.
- 112 S19. Crimella C, Arnoldi A, Crippa F, Mostacciuolo ML, Boaretto F, Sironi M, D'Angelo MG,  
113 Manzoni S, Piccinini L, Turconi AC, Toscano A, Musumeci O, Benedetti S, Fazio R,  
114 Bresolin N, Daga A, Martinuzzi A, Bassi MT. Point mutations and a large intragenic



Martinuzzi et al.,

- 115 deletion in SPG11 in complicated spastic paraplegia without thin corpus callosum. *J Med*  
116 *Genet.* 2009 May;46(5):345-51. doi: 10.1136/jmg.2008.063321. Epub 2009 Feb 5.
- 117 S20. Hehr U, Bauer P, Winner B, Schule R, Olmez A, Koehler W, Uyanik G, Engel A, Lenz D,  
118 Seibel A, Hehr A, Ploetz S, Gamez J, Rolfs A, Weis J, Ringer TM, Bonin M, Schuierer G,  
119 Marienhagen J, Bogdahn U, Weber BH, Topaloglu H, Schols L, Riess O, Winkler J. Long-  
120 term course and mutational spectrum of spatacsin-linked spastic paraplegia. *Ann Neurol.*  
121 2007 Dec;62(6):656-65.
- 122 S21. Stevanin G, Azzedine H, Denora P, Boukhris A, Tazir M, Lossos A, Rosa AL, Lerer I,  
123 Hamri A, Alegria P, Loureiro J, Tada M, Hannequin D, Anheim M, Goizet C, Gonzalez-Martinez  
124 V, Le Ber I, Forlani S, Iwabuchi K, Meiner V, Uyanik G, Erichsen AK, Feki I, Pasquier F,  
125 Belarbi S, Cruz VT, Depienne C, Truchetto J, Garrigues G, Tallaksen C, Tranchant C,  
126 Nishizawa M, Vale J, Coutinho P, Santorelli FM, Mhiri C, Brice A, Durr A; SPATAX  
127 consortium. Mutations in SPG11 are frequent in autosomal recessive spastic paraplegia with  
128 thin corpus callosum, cognitive decline and lower motor neuron degeneration. *Brain.* 2008  
129 Mar;131(Pt 3):772-84. Epub 2007 Dec 13.
- 130 S22. Vantaggiato C, Crimella C, Airoidi G, Polishchuk R, Bonato S, Brighina E, Scarlato M,  
131 Musumeci O, Toscano A, Martinuzzi A, Santorelli FM, Ballabio A, Bresolin N, Clementi E,  
132 Bassi MT. Defective autophagy in spastizin mutated patients with hereditary spastic  
133 paraparesis type 15. *Brain.* 2013 Oct;136(Pt 10):3119-39. doi: 10.1093/brain/awt227. Epub  
134 2013 Sep 11.

Martinuzzi et al.,

- 135 S23. Battini R, Fogli A, Borghetti D, Michelucci A, Perazza S, Baldinotti F, Conidi ME, Ferreri  
136 MI, Simi P, Cioni G. Clinical and genetic findings in a series of Italian children with pure  
137 hereditary spastic paraplegia. *Eur J Neurol*. 2011 Jan;18(1):150-7. doi: 10.1111/j.1468-  
138 1331.2010.03102.x.
- 139
- 140 S24. Tonelli A, D'Angelo MG, Arrigoni F, Brighina E, Arnoldi A, Citterio A, Bresolin N, Bassi  
141 MT. Atypical adult onset complicated spastic paraparesis with thin corpus callosum in two  
142 patients carrying a novel FA2H mutation. *Eur J Neurol*. 2012 Nov;19(11):e127-9. doi:  
143 10.1111/j.1468-1331.2012.03838.x. Epub 2012 Aug 27.
- 144 S25. Erichsen AK, Server A, Landro NI, Sandvik L, Tallaksen CM. Proton magnetic resonance  
145 spectroscopy and cognition in patients with spastin mutations. *J Neurol Sci* 2009; 277: 124-9.
- 146 S26. Roos P, Svenstrup K, Danielsen ER, Thomsen C, Nielsen JE. CYP7B1: novel mutations and  
147 magnetic resonance spectroscopy abnormalities in hereditary spastic paraplegia type 5A.  
148 *Acta Neurol Scand* 2014; 129: 330-4.
- 149 S27. Stromillo ML, Malandrini A, Dotti MT, Battaglini M, Borgogni F, Tessa A, et al. Structural  
150 and metabolic damage in brains of patients with SPG11-related spastic paraplegia as detected  
151 by quantitative MRI. *J Neurol* 2011; 258: 2240-7.

152

153
