# Supplementary material for: Clinical and Paraclinical Indicators of Motor System Impairment in Hereditary Spastic Paraplegia: A Pilot Study
Source: PubMed Central journal article supplement (PMC4831837; doi:10.1371/journal.pone.0153283), 2016-04-14
Supplement: pone.0153283.s002.pdf [file pone.0153283.s002.pdf]

**S1 Table Mutation detected in the reported patients**

| <b>Patient's code</b> | <b>MUTATION</b>                                       | <b>Type</b> | <b>GENE</b> | <b>Reference</b> |
|-----------------------|-------------------------------------------------------|-------------|-------------|------------------|
| #1                    | c.1413+1G>A                                           | Splicing    | SPG4        | [S1]             |
| #2                    | c.1620_1623delGACT/InsC                               | Deletion    | SPG4        |                  |
| #3                    | c.1620_1623delGACT/InsC                               | Deletion    | SPG4        |                  |
| #4                    | exon 17 deletion (MLPA)                               | Deletion    | SPG4        |                  |
| #5                    | exon 17 deletion (MLPA)                               | Deletion    | SPG4        |                  |
| #6                    | c.1709A>G p.K570R                                     | Missense    | SPG4        |                  |
| #7                    | c.1763C>A p.S588Y                                     | Missense    | SPG4        |                  |
| #8                    | c.1634G>C p.S545X                                     | Truncating  | SPG4        |                  |
| #9                    | c.1291C>T p.R431X                                     | Truncating  | SPG4        | [S2]             |
| #10                   | c.1222A>G, p.M408V                                    | Missense    | SPG3a       | [S10]            |
| #11                   | c.1222A>G, p.M408V                                    | Missense    | SPG3a       | [S10]            |
| #12                   | c.1222A>G, p.M408V                                    | Missense    | SPG3a       | [S10]            |
| #13                   | c.1222A>G, p.M408V                                    | Missense    | SPG3a       | [S10]            |
| #14                   | c.889A>G p.Y297A exon 4 /<br>c.260G>T p.G87V          | Missense    | SPG5        | [S12]            |
| #15                   | c.889A>G p.Y297A exon 4 /<br>c.260G>T p.G87V          | Missense    | SPG5        | [S12]            |
| #16                   | c.605G>A; p.S202N                                     | Missense    | SPG10       | [S16]            |
| #17                   | exon 2-5 Deletion (MLPA)                              | Deletion    | SPG31       | [S23]            |
| #18                   | c.733_734delAT/p.M245VfsX<br>/ c.7081insT p.F2361FfsX | truncating  | SPG11       | [S18]            |
| #19                   | c.1450G>C p.G484R                                     | Missense    | SPG4        |                  |
| #20                   | exon 16 deletion (MLPA)                               | Deletion    | SPG4        |                  |
| #21                   | c.1456C>T p.R486C                                     | Missense    | SPG5        | [S12]            |
| #22                   | c.1456C>T p.R486C                                     | Missense    | SPG5        | [S12]            |
| #23                   | c.1620_1623delGACT/InsC                               | Deletion    | SPG4        |                  |
| #24                   | exon 17 deletion (MLPA)                               | Deletion    | SPG4        |                  |
| #25                   | exon 17 deletion (MLPA)                               | Deletion    | SPG4        |                  |
| #26                   | c.1291C>T p.R431X                                     | Truncating  | SPG4        | [S2]             |

|     |                                                       |                     |       |            |
|-----|-------------------------------------------------------|---------------------|-------|------------|
| #27 | c.1222A>G, p.M408V                                    | Missense            | SPG3a | [S10]      |
| #28 | c.583C>G p.L195V                                      | Missense            | SPG4  | [S3]       |
| #29 | c.1507C>T p.R503W                                     | Missense            | SPG4  | [S4]       |
| #30 | c.1092G>T, p.R364S                                    | Missense            | SPG4  |            |
| #31 | c.439G>T p.E147X                                      | Truncating          | SPG4  | [S1]       |
| #32 | c.439G>T p.E147X                                      | Truncating          | SPG4  |            |
| #33 | c.583C>G p.L195V                                      | Missense            | SPG4  | [S3]       |
| #34 | c.1246-1G>T IVS9                                      | Missense            | SPG4  |            |
| #35 | c.1821G>C p.W607C                                     | Missense            | SPG4  | [S3]       |
| #36 | c.1322 -2 A>C                                         | Splicing            | SPG4  |            |
| #37 | c.1685G>A p.R562Q                                     | Missense            | SPG4  | [S5]       |
| #38 | c.439G>T p.E147X                                      | Truncating          | SPG4  | [S1]       |
| #39 | c.326C>G p.P109R                                      | Missense            | SPG4  | [S6]       |
| #40 | c.1537G>A p.G471D                                     | Missense            | SPG4  | [S7]       |
| #41 | c.854A>T p.H285L                                      | Missense            | SPG5  | [S13]      |
| #42 | c.854A>T p.H285L                                      | Missense            | SPG5  | [S13]      |
| #43 | c.679C>T, p.R227X<br>//c.1231G>A p.D412N              | Truncating/Missense | SPG7  | [S14]      |
| #44 | c.609C>G, p.S203C                                     | Missense            | SPG10 | [S17]      |
| #45 | c.609C>G, p.S203C                                     | Missense            | SPG10 | [S17]      |
| #46 | c.5014G>T E1672X /<br>c.6100C>T R2034X                | Truncating          | SPG11 | [S18]      |
| #47 | c.733-<br>734delAT/p.M245VfsX /<br>c.6157G>A p.V2053M | Truncating/Missense | SPG11 | [S18; S19] |
| #48 | c.2833A>G p.R945GfsX950                               | Truncating          | SPG11 | [S18]      |
| #49 | c.3935C>A p.S1312X                                    | Truncating          | SPG15 | [S22]      |
| #50 | c.1550G>T p.L517W                                     | Missense            | SPG4  |            |

|     |                                                           |                     |       |            |
|-----|-----------------------------------------------------------|---------------------|-------|------------|
| #51 | c.404A>G p.E135G                                          | Missense            | SPG4  |            |
| #52 | c.1496G>A p.R499H                                         | Missense            | SPG4  | [S8]       |
| #53 | c.334G>T p.E112X                                          | Truncating          | SPG4  | [S9]       |
| #54 | c.715C>T, p.R239C                                         | Missense            | SPG3a | [S11]      |
| #55 | c.650G>A, p.R217Q;                                        | Missense            | SPG3a | [S11]      |
| #56 | c.1328G>C p.G443A                                         | Missense            | SPG5  | [S13]      |
| #57 | c.1529C>T, p.A510V                                        | Missense            | SPG7  | [S14]      |
| #58 | c.1529C>T, p.A510V                                        | Missense            | SPG7  | [S14]      |
| #59 | c.233T>A p.Leu78X                                         | Truncating          | SPG7  | [S15]      |
| #60 | c.408_428del21<br>p.E136_I142del                          | Deletion            | SPG11 |            |
| #61 | c.349G>T p.E117X /<br>c.2833A>G p.R945G                   | Truncating/Missense | SPG11 | [S18; S19] |
| #62 | c.442+1G>C IVS2 /<br>c.1735+2_7del AAGT IVS8              | Splicing            | SPG11 | [S20]      |
| #63 | c. 5986_5987insT<br>p.C1996LfsX1999 /<br>c.6418C>T Q2140X | Truncating          | SPG11 | [S21]      |
| #64 | c.1203delA p.K401KfsX                                     | Truncating          | SPG11 | [S18]      |
| #65 | c.442+1G>C IVS2 / c.4161<br>-1G>A                         | Splicing            | SPG11 | [S20]      |
| #66 | c.6832_6833delAG<br>p.S2278LfsX2338                       | Truncating          | SPG11 | [S21]      |
| #67 | c.1523T>A p.I508N                                         | Missense            | SPG15 | [S22]      |
| #68 | c.1523T>A p.I508N                                         | Missense            | SPG15 | [S22]      |
| #69 | c.509A>G p.Y170C                                          | Missense            | SPG35 | [S24]      |
| #70 | c.509A>G p.Y170C                                          | Missense            | SPG35 | [S24]      |

**Note:** In bold patients that underwent the DTI and MRS protocol (n=22). References are found in the final part of the present document.

**Abbreviations:** MLPA = Multiplex Ligation-dependent Probe Amplification, SPG = Spastic Paraplegia Gene.
