# Supplementary material for: Clinical and Paraclinical Indicators of Motor System Impairment in Hereditary Spastic Paraplegia: A Pilot Study
Source: PubMed Central journal article supplement (PMC4831837; doi:10.1371/journal.pone.0153283), 2016-04-14
Supplement: pone.0153283.s003.pdf [file pone.0153283.s003.pdf]

**S2 Table. Clinical-functional data of the patients studied**

| <b>Parameters</b> | <b>n</b> | <b>mean ± SD (range)</b>     | <b>Normal values</b> |
|-------------------|----------|------------------------------|----------------------|
| SPRS              | 69       | 23.27 ± 10.74 (4-48)         | 0                    |
| 6mWT (mt)         | 40       | 220.82 ± 104.37 (64.8-412.2) | 615,5 ± 50,5 [39]    |
| FIM               | 37       | 108.32 ± 20.76 (55-126)      | 126                  |
| Muscle tone       | 70       | 2.04 ± 0.98 (0-4)            | 0                    |
| Muscle strength   | 70       | 27.23 ± 12.3 (0-40)          | 40                   |
| DTR               | 70       | 2.95 ± 0.88 (0-4)            | 2                    |

**Abbreviations:** 6MWT = (mt) 6-Minute Walking Test, normal values are mean between women and men mean values as reported in Chetta et al. [41]; DTR = Deep Tendon Reflexes (range 0-4); FIM = Functional Independence Measure (range 18-126); Muscle strength = MRC medical research council (range for single or muscle group 0-5, range for the MRC megascore 0-40); Muscle tone = Modified Ashworth Scale (range 0-4); SPRS = Spastic Paraplegia Rating Scale (range 0-52).
